# Supplementary material
Source: publisher figshare collection journal article supplement (https://sage.figshare.com/ndownloader/files/36483733)
Supplement: Supplementary file 1 [file 36483733]

**Mplus Syntax for Growth Curve Modelling (Study 1)**

**Model 1**

VARIABLE:

NAMES = team expgroup NUMDAY Sex Size

FeeStat Project psafe11 psafe12 psafe13

psafe14 psafe15 psafe21 psafe22 psafe23

psafe24 psafe25 psafe31 psafe32 psafe33

psafe34 psafe35 psafe41 psafe42 psafe43

psafe44 psafe45 psafe51 psafe52 psafe53

psafe54 psafe55 psafe61 psafe62 psafe63

psafe64 psafe65 psafe71 psafe72 psafe73

psafe74 psafe75 PSY_S1 PSY_S2 PSY_S3 PSY_S4

PSY_S5 off_lang lang_gro lang_or ut_pct1

ut_pct2 ut_pct3 ut_pct4 ut_pct5 ut_pct6

airpt_al airpt_tt utpct_al utpct_tt utpct_mo

utpct_tu utpct_thu size1 size2 size3 size4

size5 size6 repmark webpa presmark teammark

teamres atten web_mean N_BREAK web_adj Var1

contin domicile GRADE dom_oth;

USEVARIABLES = team PSY_S1 PSY_S2 PSY_S3 PSY_S4

PSY_S5 dom_oth Sex Size GRADE;

Missing are all (999);

CLUSTER = team;

ANALYSIS:

TYPE = COMPLEX;

ESTIMATOR IS ML;

ITERATIONS = 10000;

CONVERGENCE = 0.00005;

MODEL:

i s | PSY_S1@0 PSY_S2@1 PSY_S3@2 PSY_S4@3 PSY_S5@4;

i with s;

PSY_S1 (a);

PSY_S2 (a);

PSY_S3 (a);

PSY_S4 (a);

PSY_S5 (a);

i ON dom_oth@0;

s ON dom_oth@0;

i ON Sex@0;

s ON Sex@0;

i ON Size@0;

s ON Size@0;

i ON GRADE@0;

s ON GRADE@0;

OUTPUT:

CINT;

**Model 2**

VARIABLE:

NAMES = team expgroup NUMDAY Sex Size

FeeStat Project psafe11 psafe12 psafe13

psafe14 psafe15 psafe21 psafe22 psafe23

psafe24 psafe25 psafe31 psafe32 psafe33

psafe34 psafe35 psafe41 psafe42 psafe43

psafe44 psafe45 psafe51 psafe52 psafe53

psafe54 psafe55 psafe61 psafe62 psafe63

psafe64 psafe65 psafe71 psafe72 psafe73

psafe74 psafe75 PSY_S1 PSY_S2 PSY_S3 PSY_S4

PSY_S5 off_lang lang_gro lang_or ut_pct1

ut_pct2 ut_pct3 ut_pct4 ut_pct5 ut_pct6

airpt_al airpt_tt utpct_al utpct_tt utpct_mo

utpct_tu utpct_thu size1 size2 size3 size4

size5 size6 repmark webpa presmark teammark

teamres atten web_mean N_BREAK web_adj Var1

contin domicile GRADE dom_oth;

USEVARIABLES = team PSY_S1 PSY_S2 PSY_S3 PSY_S4

PSY_S5 dom_oth Sex Size GRADE;

Missing are all (999);

CLUSTER = team;

ANALYSIS:

TYPE = COMPLEX;

ESTIMATOR IS ML;

ITERATIONS = 10000;

CONVERGENCE = 0.00005;

MODEL:

i s | PSY_S1@0 PSY_S2@1 PSY_S3@2 PSY_S4@3 PSY_S5@4;

i with s;

PSY_S1 (a);

PSY_S2 (a);

PSY_S3 (a);

PSY_S4 (a);

PSY_S5 (a);

i ON dom_oth;

s ON dom_oth@0;

i ON Sex@0;

s ON Sex@0;

i ON Size@0;

s ON Size@0;

i ON GRADE@0;

s ON GRADE@0;

OUTPUT:

CINT;

**Model 3**

VARIABLE:

NAMES = team expgroup NUMDAY Sex Size

FeeStat Project psafe11 psafe12 psafe13

psafe14 psafe15 psafe21 psafe22 psafe23

psafe24 psafe25 psafe31 psafe32 psafe33

psafe34 psafe35 psafe41 psafe42 psafe43

psafe44 psafe45 psafe51 psafe52 psafe53

psafe54 psafe55 psafe61 psafe62 psafe63

psafe64 psafe65 psafe71 psafe72 psafe73

psafe74 psafe75 PSY_S1 PSY_S2 PSY_S3 PSY_S4

PSY_S5 off_lang lang_gro lang_or ut_pct1

ut_pct2 ut_pct3 ut_pct4 ut_pct5 ut_pct6

airpt_al airpt_tt utpct_al utpct_tt utpct_mo

utpct_tu utpct_thu size1 size2 size3 size4

size5 size6 repmark webpa presmark teammark

teamres atten web_mean N_BREAK web_adj Var1

contin domicile GRADE dom_oth;

USEVARIABLES = team PSY_S1 PSY_S2 PSY_S3 PSY_S4

PSY_S5 dom_oth Sex Size GRADE;

Missing are all (999);

CLUSTER = team;

ANALYSIS:

TYPE = COMPLEX;

ESTIMATOR IS ML;

ITERATIONS = 10000;

CONVERGENCE = 0.00005;

MODEL:

i s | PSY_S1@0 PSY_S2@1 PSY_S3@2 PSY_S4@3 PSY_S5@4;

i with s;

PSY_S1 (a);

PSY_S2 (a);

PSY_S3 (a);

PSY_S4 (a);

PSY_S5 (a);

i ON dom_oth;

s ON dom_oth;

i ON Sex@0;

s ON Sex@0;

i ON Size@0;

s ON Size@0;

i ON GRADE@0;

s ON GRADE@0;

OUTPUT:

CINT;

**Model 4**

VARIABLE:

NAMES = team expgroup NUMDAY Sex Size

FeeStat Project psafe11 psafe12 psafe13

psafe14 psafe15 psafe21 psafe22 psafe23

psafe24 psafe25 psafe31 psafe32 psafe33

psafe34 psafe35 psafe41 psafe42 psafe43

psafe44 psafe45 psafe51 psafe52 psafe53

psafe54 psafe55 psafe61 psafe62 psafe63

psafe64 psafe65 psafe71 psafe72 psafe73

psafe74 psafe75 PSY_S1 PSY_S2 PSY_S3 PSY_S4

PSY_S5 off_lang lang_gro lang_or ut_pct1

ut_pct2 ut_pct3 ut_pct4 ut_pct5 ut_pct6

airpt_al airpt_tt utpct_al utpct_tt utpct_mo

utpct_tu utpct_thu size1 size2 size3 size4

size5 size6 repmark webpa presmark teammark

teamres atten web_mean N_BREAK web_adj Var1

contin domicile GRADE dom_oth;

USEVARIABLES = team PSY_S1 PSY_S2 PSY_S3 PSY_S4

PSY_S5 dom_oth Sex Size GRADE;

Missing are all (999);

CLUSTER = team;

ANALYSIS:

TYPE = COMPLEX;

ESTIMATOR IS ML;

ITERATIONS = 10000;

CONVERGENCE = 0.00005;

MODEL:

i s | PSY_S1@0 PSY_S2@1 PSY_S3@2 PSY_S4@3 PSY_S5@4;

i with s;

PSY_S1 (a);

PSY_S2 (a);

PSY_S3 (a);

PSY_S4 (a);

PSY_S5 (a);

i ON dom_oth;

s ON dom_oth;

i ON Sex;

s ON Sex;

i ON Size;

s ON Size;

i ON GRADE;

s ON GRADE;

OUTPUT:

CINT;

**Serial Mediation Model**

VARIABLE:

NAMES = team expgroup NUMDAY Sex Size

FeeStat Project psafe11 psafe12 psafe13

psafe14 psafe15 psafe21 psafe22 psafe23

psafe24 psafe25 psafe31 psafe32 psafe33

psafe34 psafe35 psafe41 psafe42 psafe43

psafe44 psafe45 psafe51 psafe52 psafe53

psafe54 psafe55 psafe61 psafe62 psafe63

psafe64 psafe65 psafe71 psafe72 psafe73

psafe74 psafe75 PSY_S1 PSY_S2 PSY_S3 PSY_S4

PSY_S5 off_lang lang_gro lang_or ut_pct1

ut_pct2 ut_pct3 ut_pct4 ut_pct5 ut_pct6

airpt_al airpt_tt utpct_al utpct_tt utpct_mo

utpct_tu utpct_th size1 size2 size3 size4

size5 size6 repmark webpa presmark teammark

teamres atten web_mean N_BREAK web_adj Var1

contin domicile GRADE dom_oth;

USEVARIABLES = team PSY_S1 PSY_S2 PSY_S3 PSY_S4 PSY_S5

utpct_th web_adj atten Sex Var1 GRADE dom_oth;

Missing are all (999);

WEIGHT IS VAR1;

CLUSTER = team;

ANALYSIS:

TYPE = COMPLEX;

ESTIMATOR = MLR;

ITERATIONS = 10000;

CONVERGENCE = 0.00005;

BOOTSTRAP = 10000;

REPSE=BOOTSTRAP;

MODEL:

i s | PSY_S1@0 PSY_S2@1 PSY_S3@2 PSY_S4@3 PSY_S5@4;

i@0;

PSY_S1 (a);

PSY_S2 (a);

PSY_S3 (a);

PSY_S4 (a);

PSY_S5 (a);

web_adj ON Sex atten GRADE;

web_adj ON utpct_th (b1);

web_adj ON s (b2);

web_adj ON dom_oth (cdash);

utpct_th ON Sex atten GRADE;

utpct_th ON dom_oth (a1);

s ON Sex atten GRADE;

s ON dom_oth (a2);

utpct_th ON s (d1);

MODEL CONSTRAINT:

NEW(a1b1 a2b2 a2d1b1 TOTALIND TOTAL);

a1b1 = a1*b1; ! Path from national status via verbal behavior to competence ratings

a2b2 = a2*b2; ! Path from national status via psychological safety growth to

competence ratings

a2d1b1 = a2*d1*b1; !Path from national status to psychological safety growth to verbal

behavior to competence ratings

TOTALIND = a1*b1 + a2*b2 + a2*d1*b1; !sum of indirect effects

TOTAL = a1*b1 + a2*b2 + a2*d1*b1 + cdash; !sum of direct effects

OUTPUT:

STAND CINT(bcbootstrap);
